# Supplementary material
Source: MDPI journal article supplement (https://www.mdpi.com/2297-8739/10/3/200)
Supplement: s1 [file s1]

# Effective Removal of Methylene Blue by $\text{Mn}_3\text{O}_4/\text{NiO}$ Nanocomposite under Visible Light

Komal Majeed <sup>1</sup>, Jaweria Ambreen <sup>1,\*</sup>, Saeed Ahmed Khan <sup>2</sup>, Saz Muhammad <sup>3</sup>, Aqeel Ahmed Shah <sup>4</sup>, Muhammad Ali Bhatti <sup>5</sup>, Syeda Sitwat Batool <sup>6</sup>, Muhammad Farooq <sup>7</sup>, Syed Nizam Uddin Shah Bukhari <sup>8</sup>, Ali Dad Chandio <sup>4</sup>, Sadaf Jamal Gilani <sup>9</sup> and May Nasser Bin Jumah <sup>10,11,12</sup>

<sup>1</sup> Department of Chemistry, COMSATS University Islamabad, Park Road, Islamabad 45550, Pakistan

<sup>2</sup> Department of Electrical Engineering, Sukkur IBA University, Sukkur 65200, Pakistan

<sup>3</sup> Department of Chemistry, Lahore Garrison University, DHA Phase VI, Lahore 54792, Pakistan

<sup>4</sup> Wet Chemistry Laboratory, Department of metallurgical Engineering, NED University of Engineering and Technology, University Road, Karachi 75720, Pakistan

<sup>5</sup> Institute of Environmental Sciences, University of Sindh Jamshoro, Jamshoro 76080, Pakistan

<sup>6</sup> Department of Physics, COMSATS University Islamabad, Park Road, Islamabad 45550, Pakistan; sitwatnaqvi@comsats.edu.pk

<sup>7</sup> Pakistan Council of Scientific and Industrial Research (PCSIR), PCSIR Head Office, 01-Constitution Avenue, Sector G-5/2, Islamabad 44000, Pakistan

<sup>8</sup> Department of Basic Science and Humanities, Dawood University of Engineering and Technology, Karachi 74800, Pakistan

<sup>9</sup> Department of Basic Health Sciences, Foundation Year Princess Nourah bint Abdulrahman University, Riyadh 11671, Saudi Arabia

<sup>10</sup> Biology Department, College of Science, Princess Nourah bint Abdulrahman University, Riyadh 11671, Saudi Arabia

<sup>11</sup> Environment and Biomaterial Unit, Health Sciences Research Center, Princess Nourah bint Abdulrahman University, Riyadh 11671, Saudi Arabia

<sup>12</sup> Saudi Society for Applied Science, Princess Nourah bint Abdulrahman University, Riyadh 11671, Saudi Arabia

\* Correspondence: jaweria.ambreen@comsats.edu.pk

## Supplementary information

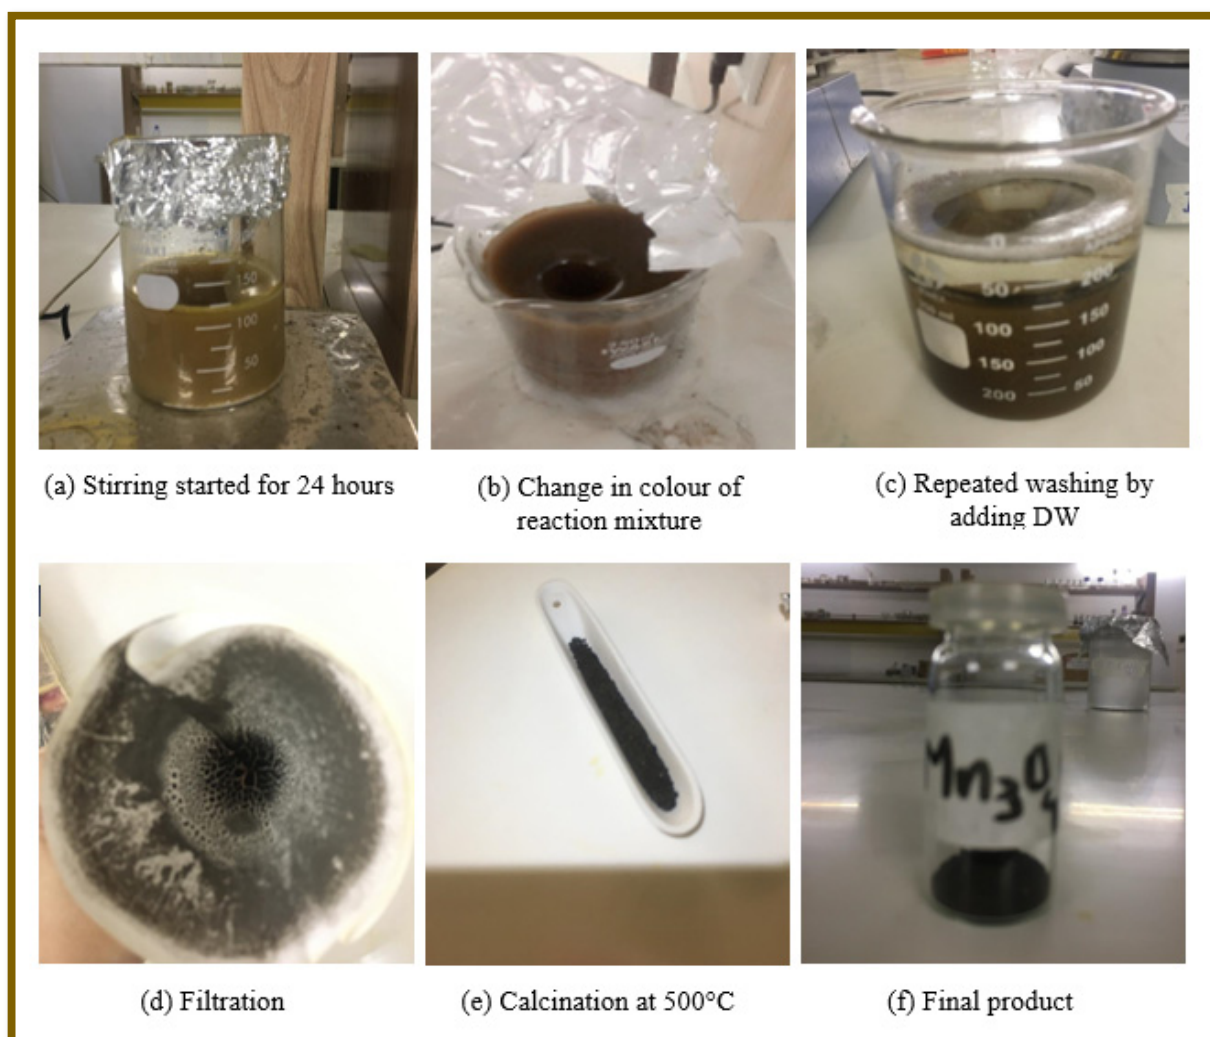

**Figure S1.** Pictorial description of synthesis steps for  $\text{Mn}_3\text{O}_4$  NPs

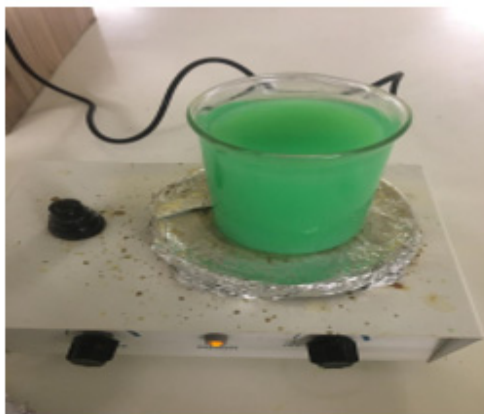

(a) Initially reaction mixture at 50°C

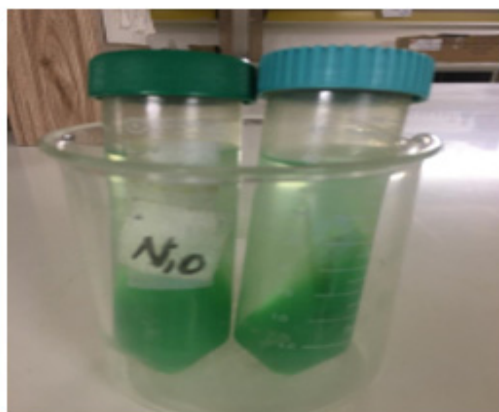

(b) Centrifugation

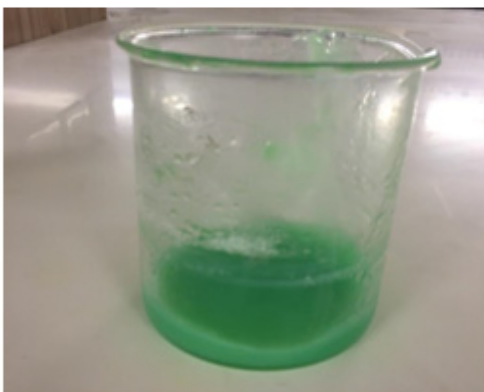

(c) Gel formation after oven drying

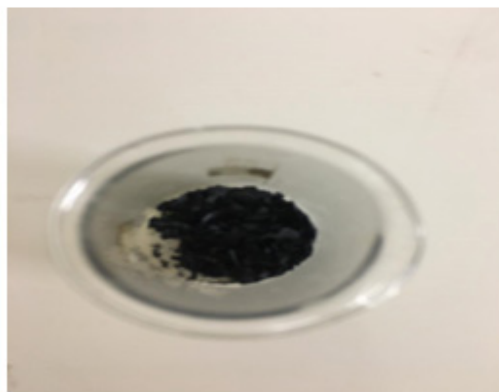

(d) Final product after calcination of gel

**Figure S2.** Pictorial description of synthesis steps for NiO NPs

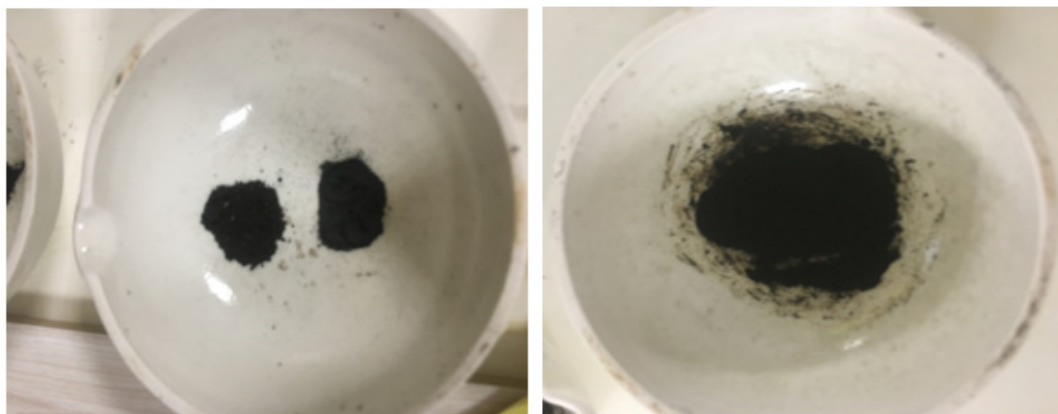

(a) Calculated amounts of both the samples (b) Mixing and grinding of powdered Samples

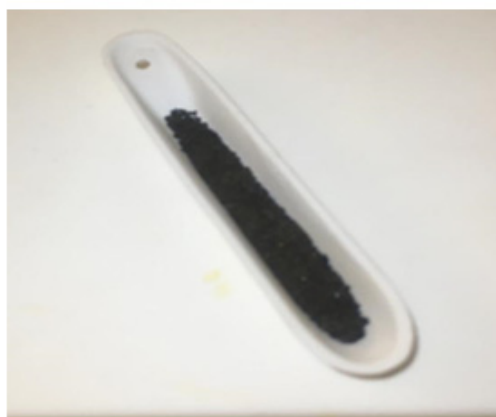

(c) Calcination at 80°C

**Figure S3.** Pictorial description of Mn<sub>3</sub>O<sub>4</sub>/NiO nanocomposite formation

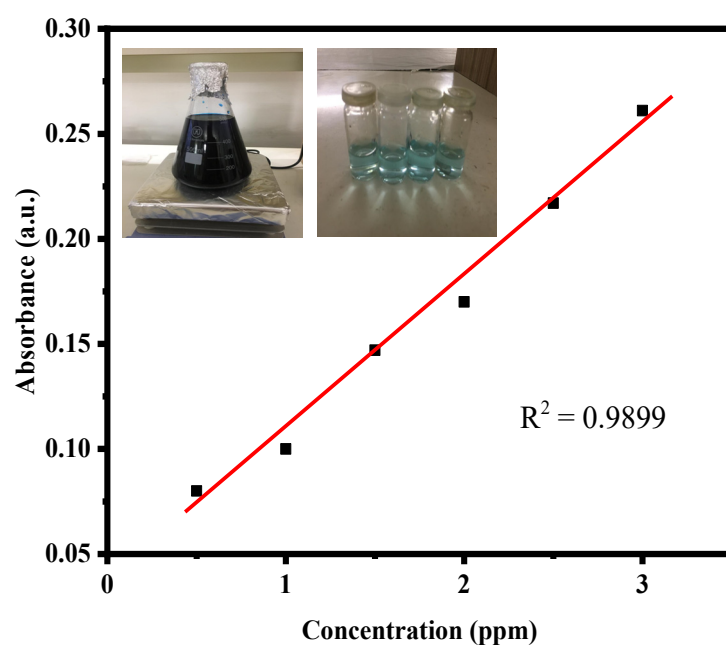

**Figure S4.** Calibration curve of diluted stock solution

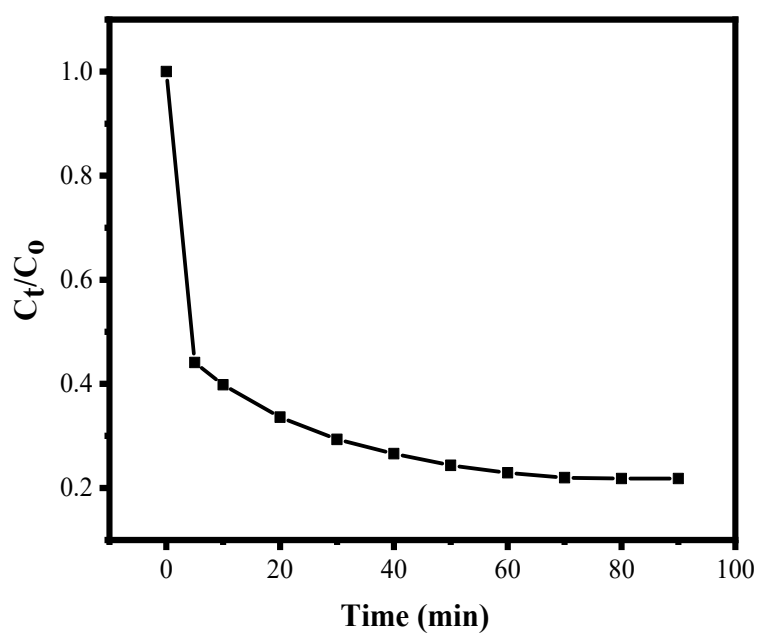

**Figure S5.** Adsorption capacity of MB dye Vs. time in dark

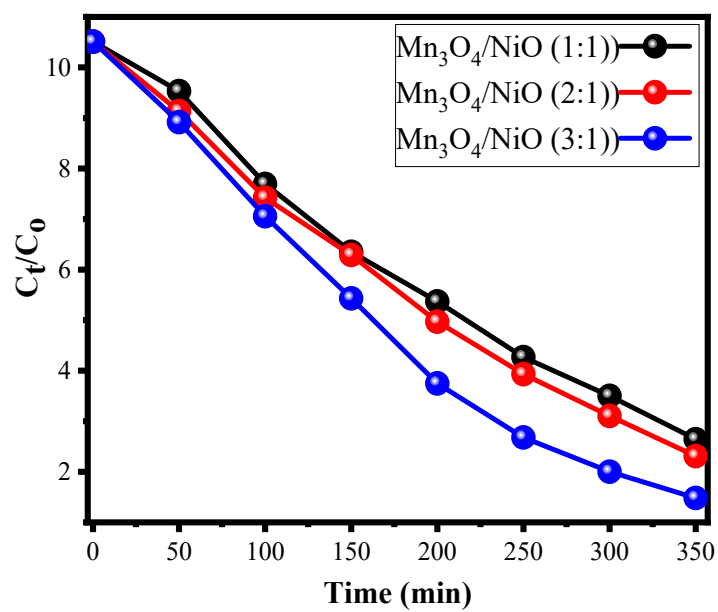

**Figure S6.** Remaining concentration of dye Vs. time interval

**Table S1.** XRD measurement of  $Mn_3O_4$  NPs

| 2 $\theta$ (degree) | hkl | FWHM  | d-spacing |
|---------------------|-----|-------|-----------|
| 38.48               | 004 | 0.393 | 2.34      |
| 44.61               | 220 | 0.344 | 2.03      |
| 64.83               | 400 | 0.590 | 1.43      |
| 72.61               | 332 | 0.344 | 1.30      |
| 78.06               | 325 | 0.366 | 1.22      |

**Table S2.** XRD measurement of NiO NPs

| <b>2<math>\theta</math> (degree)</b> | <b>hkl</b> | <b>FWHM</b> | <b>d-spacing</b> |
|--------------------------------------|------------|-------------|------------------|
| 36.6                                 | 003        | 0.787       | 2.44             |
| 42.7                                 | 012        | 0.688       | 2.12             |
| 44.6                                 | 200        | 0.196       | 2.02             |
| 62.5                                 | 104        | 0.590       | 1.48             |
| 72.7                                 | 311        | 0.492       | 1.30             |

**Table S3.** XRD measurement of nanocomposite Mn<sub>3</sub>O<sub>4</sub>: NiO (1:1)

| <b>2<math>\theta</math> (degree)</b> | <b>hkl</b> | <b>FWHM</b> | <b>d-spacing</b> |
|--------------------------------------|------------|-------------|------------------|
| 38.31                                | 004        | 0.31        | 2.34             |
| 44.75                                | 220        | 0.26        | 2.02             |
| 64.97                                | 400        | 0.27        | 1.43             |
| 72.56                                | 332        | 0.53        | 1.30             |
| 78.12                                | 325        | 0.3         | 1.22             |

**Table S4.** XRD measurement of nanocomposite Mn<sub>3</sub>O<sub>4</sub>/NiO (3:1)

| <b>2<math>\theta</math> (degree)</b> | <b>hkl</b> | <b>FWHM</b> | <b>d-spacing</b> |
|--------------------------------------|------------|-------------|------------------|
| 38.41                                | 004        | 0.393       | 2.34             |
| 42.05                                | 012        | 0.590       | 2.14             |
| 44.68                                | 220        | 0.295       | 2.02             |
| 72.61                                | 332        | 0.393       | 1.30             |
| 78.23                                | 325        | 0.3         | 1.21             |
